# Supplementary material
Source: Springer Nature journal article supplement (https://mijn.bsl.nl/resource/supplementary/13047_2011_345_MOESM1_ESM.pdf/7110572)
Supplement: MOESM1 [file 7110572]

Identification

Records identified through database searching to July 2010: Medline 227, EMBASE 204, CINAHL 303, AMED 87, CENTRAL 124

Additional records identified through Meta-register and other sources: (n = 0)

Screening

Records after duplicates removed (n = 527)

Records screened (n = 527)

Records excluded (n = 495)

Eligibility

Full-text articles assessed for eligibility (n = 32)

Full-text articles excluded (n = 26) not adhering to eligibility criteria

Included

Studies included in synthesis (n = 6)
